# Supplementary material
Source: PubMed Central journal article supplement (PMC4317467)
Supplement: NIHMS644907-supplement-Tables_1_-_4.pdf [file NIHMS644907-supplement-Tables_1_-_4.pdf]

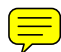

529 **Supplemental Materials**

530 Supplemental Table 1. Variance components of indoor VOC concentrations, partitioned using the original  
 531 data and the data with replicate measurements averaged.  $\sigma^2_C$  = between-city variation;  $\sigma^2_R$  = between-  
 532 residence variation;  $\sigma^2_S$  = seasonal variation;  $\sigma^2_E$  = measurement uncertainty.

| VOCs                         | Original Data<br>(n=481) |                     |                     |                     | Replicates Averaged<br>(n=244) |                     |                     |
|------------------------------|--------------------------|---------------------|---------------------|---------------------|--------------------------------|---------------------|---------------------|
|                              | $\sigma^2_C$<br>(%)      | $\sigma^2_R$<br>(%) | $\sigma^2_S$<br>(%) | $\sigma^2_E$<br>(%) | $\sigma^2_C$<br>(%)            | $\sigma^2_R$<br>(%) | $\sigma^2_S$<br>(%) |
| <b>Aromatic compounds</b>    |                          |                     |                     |                     |                                |                     |                     |
| Benzene                      | 0.0                      | 30.3                | 67.6                | 2.1                 | 0.0                            | 33.3                | 66.7                |
| Toluene                      | 4.2                      | 53.2                | 41.5                | 1.1                 | 4.3                            | 54.0                | 41.7                |
| Ethylbenzene                 | 2.9                      | 38.0                | 57.6                | 1.5                 | 3.1                            | 39.3                | 57.6                |
| p,m-Xylene                   | 2.2                      | 45.0                | 51.6                | 1.3                 | 2.3                            | 46.1                | 51.6                |
| o-Xylene                     | 3.3                      | 44.1                | 51.0                | 1.7                 | 3.4                            | 45.3                | 51.2                |
| Styrene                      | 8.4                      | 21.4                | 64.5                | 5.6                 | 9.1                            | 22.5                | 68.5                |
| 1,2,4-Trimethylbenzene       | 7.9                      | 45.5                | 44.9                | 1.7                 | 8.2                            | 46.5                | 45.2                |
| 1,3,5-Trimethylbenzene       | 8.4                      | 40.2                | 47.2                | 4.2                 | 8.7                            | 41.9                | 49.4                |
| 1,2,3-Trimethylbenzene       | 9.6                      | 36.4                | 50.0                | 4.0                 | 10.0                           | 37.8                | 52.2                |
| 4-Ethyl toluene              | 10.0                     | 33.5                | 54.1                | 2.5                 | 10.5                           | 34.3                | 55.2                |
| 2-Ethyl toluene              | 9.0                      | 37.9                | 50.3                | 2.8                 | 9.3                            | 39.2                | 51.5                |
| Isopropylbenzene             | 6.0                      | 35.8                | 45.7                | 12.5                | 6.4                            | 39.0                | 54.6                |
| n-Propylbenzene              | 6.1                      | 40.5                | 48.0                | 5.4                 | 6.6                            | 42.1                | 51.3                |
| p-Isopropyltoluene           | 22.2                     | 14.6                | 56.8                | 6.4                 | 23.2                           | 15.4                | 61.4                |
| n-Butylbenzene               | 10.1                     | 27.5                | 40.4                | 22.0                | 11.3                           | 31.5                | 57.1                |
| Naphthalene                  | 0.0                      | 61.7                | 25.0                | 13.3                | 0.0                            | 66.6                | 33.4                |
| <b>Chlorinated compounds</b> |                          |                     |                     |                     |                                |                     |                     |
| Chloroform                   | 38.2                     | 17.0                | 24.6                | 20.2                | 43.0                           | 18.9                | 38.2                |
| Tetrachloroethene            | 13.4                     | 36.5                | 27.8                | 22.2                | 15.3                           | 41.2                | 43.5                |
| Carbon tetrachloride         | 3.0                      | 0.0                 | 58.9                | 38.1                | 4.0                            | 0.0                 | 96.0                |
| 1,4-Dichlorobenzene          | 9.2                      | 53.1                | 27.3                | 10.4                | 9.8                            | 55.8                | 34.4                |
| <b>Aliphatic compounds</b>   |                          |                     |                     |                     |                                |                     |                     |
| Methyl cyclohexane           | 12.8                     | 28.3                | 46.6                | 12.3                | 14.1                           | 29.8                | 56.1                |
| n-Nonane                     | 3.5                      | 6.5                 | 63.6                | 26.4                | 3.9                            | 7.4                 | 88.7                |
| n-Decane                     | 4.5                      | 7.7                 | 75.5                | 12.3                | 5.1                            | 8.3                 | 86.6                |
| n-Undecane                   | 2.8                      | 15.9                | 69.1                | 12.2                | 3.3                            | 17.4                | 79.3                |
| n-Dodecane                   | 5.3                      | 25.0                | 53.1                | 16.6                | 6.2                            | 27.8                | 66.0                |
| n-Tridecane                  | 14.4                     | 28.3                | 42.6                | 14.6                | 15.9                           | 31.0                | 53.1                |
| n-Tetradecane                | 10.5                     | 34.4                | 42.1                | 13.0                | 11.3                           | 37.0                | 51.7                |
| n-Pentadecane                | 6.9                      | 22.9                | 55.5                | 14.7                | 7.5                            | 25.0                | 67.4                |
| n-Hexadecane                 | 4.5                      | 21.6                | 50.7                | 23.2                | 5.3                            | 25.0                | 69.6                |
| n-Heptadecane                | 4.2                      | 13.0                | 54.7                | 28.1                | 5.1                            | 16.0                | 78.9                |
| <b>Terpenoid compounds</b>   |                          |                     |                     |                     |                                |                     |                     |
| $\alpha$ -Pinene             | 2.1                      | 51.0                | 45.5                | 1.4                 | 2.0                            | 51.5                | 46.5                |
| d-Limonene                   | 11.1                     | 19.6                | 66.5                | 2.8                 | 11.5                           | 19.9                | 68.6                |
| <b>TVOC</b>                  | 8.1                      | 35.4                | 54.4                | 2.1                 | 8.5                            | 36.2                | 55.2                |

533

534

535 Supplemental Table 2. Variance components of outdoor VOC concentrations, partitioned using the  
 536 original data and the data with replicate measurements averaged.  $\sigma^2_C$  = between-city variation;  $\sigma^2_R$  =  
 537 between-residence variation;  $\sigma^2_S$  = seasonal variation;  $\sigma^2_E$  = measurement uncertainty.

| VOCs                         | Original Data<br>(n=437) |                     |                     |                     | Replicates Averaged<br>(n=228) |                     |                     |
|------------------------------|--------------------------|---------------------|---------------------|---------------------|--------------------------------|---------------------|---------------------|
|                              | $\sigma^2_C$<br>(%)      | $\sigma^2_R$<br>(%) | $\sigma^2_S$<br>(%) | $\sigma^2_E$<br>(%) | $\sigma^2_C$<br>(%)            | $\sigma^2_R$<br>(%) | $\sigma^2_S$<br>(%) |
| <b>Aromatic compounds</b>    |                          |                     |                     |                     |                                |                     |                     |
| Benzene                      | 10.9                     | 0.0                 | 82.2                | 6.9                 | 11.2                           | 0.0                 | 88.8                |
| Toluene                      | 37.6                     | 0.0                 | 56.0                | 6.4                 | 39.3                           | 0.0                 | 60.7                |
| Ethylbenzene                 | 38.3                     | 0.0                 | 55.3                | 6.4                 | 40.2                           | 0.1                 | 59.7                |
| p,m-Xylene                   | 41.5                     | 1.0                 | 51.6                | 5.9                 | 43.2                           | 1.5                 | 55.3                |
| o-Xylene                     | 41.3                     | 0.0                 | 49.9                | 8.8                 | 43.5                           | 0.6                 | 55.9                |
| Styrene                      | 19.2                     | 0.0                 | 53.6                | 27.2                | 22.3                           | 0.0                 | 77.7                |
| 1,2,4-Trimethylbenzene       | 44.4                     | 0.0                 | 45.8                | 9.8                 | 47.0                           | 0.0                 | 53.0                |
| 1,3,5-Trimethylbenzene       | 45.1                     | 3.4                 | 37.8                | 13.7                | 48.5                           | 4.2                 | 47.3                |
| 1,2,3-Trimethylbenzene       | 45.4                     | 0.0                 | 35.3                | 19.2                | 50.2                           | 0.0                 | 49.8                |
| 4-Ethyl toluene              | 35.0                     | 0.6                 | 45.7                | 18.7                | 38.6                           | 2.0                 | 59.4                |
| 2-Ethyl toluene              | 42.6                     | 0.0                 | 42.3                | 15.1                | 46.2                           | 0.1                 | 53.6                |
| Isopropylbenzene             | 35.2                     | 0.6                 | 27.4                | 36.8                | 42.9                           | 0.3                 | 56.8                |
| n-Propylbenzene              | 44.1                     | 1.4                 | 31.5                | 22.9                | 50.0                           | 1.5                 | 48.5                |
| p-Isopropyltoluene           | 31.9                     | 0.0                 | 50.5                | 17.6                | 34.9                           | 0.0                 | 65.1                |
| Naphthalene                  | 5.6                      | 0.0                 | 49.6                | 44.9                | 6.6                            | 0.0                 | 93.4                |
| <b>Chlorinated compounds</b> |                          |                     |                     |                     |                                |                     |                     |
| Tetrachloroethene            | 28.8                     | 5.3                 | 6.0                 | 59.9                | 41.4                           | 7.7                 | 50.9                |
| Carbon tetrachloride         | 2.9                      | 0.0                 | 58.6                | 38.5                | 3.4                            | 0.0                 | 96.6                |
| 1,4-Dichlorobenzene          | 17.4                     | 13.6                | 14.4                | 54.6                | 23.6                           | 20.6                | 55.8                |
| <b>Aliphatic compounds</b>   |                          |                     |                     |                     |                                |                     |                     |
| Methyl cyclohexane           | 25.8                     | 0.0                 | 29.2                | 45.1                | 33.6                           | 0.0                 | 66.4                |
| n-Nonane                     | 11.4                     | 0.0                 | 45.3                | 43.3                | 14.9                           | 0.0                 | 85.1                |
| n-Decane                     | 20.4                     | 1.5                 | 39.8                | 38.3                | 25.6                           | 0.5                 | 73.9                |
| <b>Terpenoid compounds</b>   |                          |                     |                     |                     |                                |                     |                     |
| $\alpha$ -Pinene             | 0.0                      | 0.0                 | 64.5                | 35.5                | 0.0                            | 0.0                 | 100.0               |
| d-Limonene                   | 32.8                     | 0.0                 | 11.8                | 55.4                | 45.3                           | 0.0                 | 54.7                |
| <b>TVOC</b>                  | <b>37.7</b>              | <b>0.8</b>          | <b>56.0</b>         | <b>5.5</b>          | <b>38.9</b>                    | <b>1.3</b>          | <b>59.7</b>         |

538

539

540 Supplemental Table 3. Factor patterns of indoor VOC concentrations. Factor loadings >0.5 are  
 541 highlighted.

| VOCs                   | Factor1     | Factor2     | Factor3     | Factor4     | Factor5     | Factor6     | Factor7     |
|------------------------|-------------|-------------|-------------|-------------|-------------|-------------|-------------|
| Benzene                | <b>0.63</b> | -0.06       | -0.06       | 0.11        | 0.00        | -0.07       | <b>0.61</b> |
| Toluene                | <b>0.77</b> | 0.26        | 0.01        | 0.25        | -0.04       | -0.02       | 0.17        |
| Ethylbenzene           | <b>0.89</b> | 0.13        | 0.06        | 0.19        | 0.02        | 0.08        | 0.12        |
| p,m-Xylene             | <b>0.93</b> | 0.08        | 0.06        | 0.13        | 0.02        | 0.04        | 0.12        |
| o-Xylene               | <b>0.94</b> | 0.09        | 0.09        | 0.14        | 0.03        | 0.04        | 0.10        |
| Styrene                | 0.30        | 0.27        | 0.16        | <b>0.68</b> | 0.04        | 0.16        | 0.07        |
| 1,2,4-Trimethylbenzene | <b>0.92</b> | 0.07        | 0.27        | 0.11        | 0.10        | -0.01       | 0.02        |
| 1,3,5-Trimethylbenzene | <b>0.91</b> | 0.08        | 0.28        | 0.08        | 0.07        | 0.01        | -0.01       |
| 1,2,3-Trimethylbenzene | <b>0.83</b> | 0.08        | 0.37        | 0.16        | 0.15        | 0.03        | 0.02        |
| 4-Ethyl toluene        | <b>0.76</b> | 0.12        | 0.11        | 0.09        | 0.12        | 0.17        | 0.00        |
| 2-Ethyl toluene        | <b>0.91</b> | 0.06        | 0.30        | 0.11        | 0.11        | 0.00        | 0.01        |
| Isopropylbenzene       | <b>0.79</b> | 0.12        | 0.33        | 0.17        | 0.09        | 0.05        | -0.12       |
| n-Propylbenzene        | <b>0.91</b> | 0.09        | 0.27        | 0.14        | 0.07        | 0.03        | 0.02        |
| p-Isopropyltoluene     | 0.25        | 0.30        | 0.20        | <b>0.68</b> | 0.31        | 0.06        | 0.06        |
| n-Butylbenzene         | <b>0.71</b> | 0.09        | 0.41        | 0.17        | 0.15        | 0.14        | 0.03        |
| Naphthalene            | 0.25        | 0.33        | 0.14        | 0.13        | -0.29       | <b>0.62</b> | 0.12        |
| Chloroform             | 0.05        | 0.19        | 0.17        | 0.24        | <b>0.61</b> | 0.36        | 0.12        |
| Tetrachloroethene      | 0.26        | 0.18        | 0.02        | 0.10        | <b>0.64</b> | -0.01       | 0.06        |
| Carbon tetrachloride   | 0.06        | -0.02       | 0.13        | 0.05        | 0.13        | 0.06        | <b>0.91</b> |
| 1,4-Dichlorobenzene    | 0.01        | 0.13        | -0.04       | 0.10        | 0.25        | <b>0.82</b> | -0.04       |
| Methyl cyclohexane     | <b>0.54</b> | 0.18        | 0.24        | 0.15        | 0.39        | -0.12       | 0.12        |
| n-Nonane               | 0.39        | 0.11        | <b>0.75</b> | 0.01        | 0.12        | 0.03        | 0.00        |
| n-Decane               | 0.36        | 0.11        | <b>0.84</b> | 0.15        | 0.08        | 0.06        | 0.02        |
| n-Undecane             | 0.32        | 0.17        | <b>0.83</b> | 0.16        | -0.01       | 0.01        | 0.08        |
| n-Dodecane             | 0.28        | 0.43        | <b>0.60</b> | 0.29        | 0.06        | -0.02       | 0.14        |
| n-Tridecane            | 0.21        | <b>0.69</b> | 0.20        | 0.21        | 0.15        | -0.11       | -0.02       |
| n-Tetradecane          | 0.11        | <b>0.90</b> | 0.09        | 0.21        | 0.10        | 0.06        | 0.00        |
| n-Pentadecane          | 0.08        | <b>0.93</b> | 0.09        | 0.17        | 0.09        | 0.12        | 0.00        |
| n-Hexadecane           | 0.08        | <b>0.90</b> | 0.11        | 0.13        | 0.08        | 0.15        | -0.01       |
| n-Heptadecane          | 0.07        | <b>0.87</b> | 0.07        | 0.14        | 0.05        | 0.17        | -0.02       |
| $\alpha$ -Pinene       | 0.33        | 0.24        | 0.03        | <b>0.73</b> | -0.09       | 0.05        | -0.03       |
| d-Limonene             | 0.14        | 0.25        | 0.18        | <b>0.76</b> | 0.28        | 0.07        | 0.07        |

542

543

544

545 Supplemental Table 4. Factor patterns of outdoor VOC concentrations. Factor loadings >0.5 are  
 546 highlighted.

| VOCs                   | Factor1     | Factor2     | Factor3     | Factor4     |
|------------------------|-------------|-------------|-------------|-------------|
| Benzene                | 0.48        | 0.23        | 0.04        | <b>0.71</b> |
| Toluene                | <b>0.87</b> | 0.24        | 0.22        | 0.21        |
| Ethylbenzene           | <b>0.88</b> | 0.27        | 0.20        | 0.17        |
| p,m-Xylene             | <b>0.90</b> | 0.25        | 0.20        | 0.16        |
| o-Xylene               | <b>0.89</b> | 0.28        | 0.21        | 0.17        |
| Styrene                | 0.35        | <b>0.69</b> | 0.00        | 0.03        |
| 1,2,4-Trimethylbenzene | <b>0.89</b> | 0.28        | 0.19        | 0.10        |
| 1,3,5-Trimethylbenzene | <b>0.90</b> | 0.28        | 0.18        | 0.06        |
| 1,2,3-Trimethylbenzene | <b>0.76</b> | 0.43        | 0.28        | 0.10        |
| 4-Ethyl toluene        | <b>0.79</b> | 0.29        | 0.20        | 0.00        |
| 2-Ethyl toluene        | <b>0.89</b> | 0.30        | 0.18        | 0.09        |
| Isopropylbenzene       | <b>0.56</b> | 0.48        | 0.44        | 0.19        |
| n-Propylbenzene        | <b>0.73</b> | 0.46        | 0.35        | 0.09        |
| p-Isopropyltoluene     | 0.35        | 0.21        | <b>0.68</b> | 0.12        |
| Naphthalene            | 0.19        | <b>0.74</b> | 0.13        | 0.15        |
| Tetrachloroethene      | 0.42        | <b>0.58</b> | 0.30        | 0.10        |
| Carbon tetrachloride   | 0.06        | 0.06        | 0.01        | <b>0.92</b> |
| 1,4-Dichlorobenzene    | 0.24        | <b>0.56</b> | 0.48        | 0.14        |
| Methyl cyclohexane     | 0.48        | <b>0.59</b> | 0.30        | 0.17        |
| n-Nonane               | 0.35        | <b>0.57</b> | 0.46        | -0.03       |
| n-Decane               | 0.45        | <b>0.54</b> | 0.42        | 0.03        |
| $\alpha$ -Pinene       | 0.10        | 0.03        | <b>0.81</b> | -0.09       |
| d-Limonene             | 0.24        | 0.44        | <b>0.69</b> | 0.07        |

547

548
